# Supplementary material for: Single-Cell Analysis Revealed the Role of CD8+ Effector T Cells in Preventing Cardioprotective Macrophage Differentiation in the Early Phase of Heart Failure
Source: Front Immunol. 2021 Oct 20;12:763647. doi: 10.3389/fimmu.2021.763647 (PMC8564148; doi:10.3389/fimmu.2021.763647)
Supplement: Supplementary file 3 [file Table_1.xlsx]

## Sheet: FCM antibodies
Company	Label	Target	Clone
BioLegend	Biotin	B220	RA3-6B2
BD	Brilliant Violet 421	CCR2(CD192)	475301
TONBO	APC Cy7	CD3ε	145-2c11
eBioscience	Biotin	CD4	RM4-5
eBioscience	PE	CD4	RM4-5
eBioscience	APC	CD8α	53-6.7
BioLegend	Biotin	CD11b	M1/70
eBioscience	PE Cy7	CD11b	M1/71
eBioscience	Biotin	CD11c	N418
eBioscience	Biotin	CD19	MB19-1
BioLegend	APC Cy7	CD19	6D5
BioLegend	Brilliant Violet 421	CD45	30-F11
BioLegend	FITC	CD45	30-F11
BioLegend	APC	CD45.2	102
eBioscience	Biotin	CD105	MJ7/18
eBioscience	APC	F4/80	BM8
eBioscience	Biotin	Gr1(Ly6g,Ly6c)	RB6-8c5
BioLegend	FITC	Ly6c	HK1.4
BioLegend	APC Cy7	Ly6g	1A8
BioLegend	Biotin	NK1.1	PK136
BD	Brilliant Violet 421	TCR β	H57-597
eBioscience	Biotin	TCR γδ	GL-3
eBioscience	Biotin	Ter119	PK136
eBioscience	eFluor 780	Fixable Viability Dye (FVD)	−
eBioscience	PE Cy7	granzyme B	NGZB
R&D	Biotin	Amphiregulin	E. coli-derived recombinant mouse Amphiregulin Ser94-Lys191 Accession # Q4FJT2

## Sheet: FCM reagents
Reagents for mice analysis
Company	Name	Product No	Application	Dilution	Protocol
eBioscience	Foxp3/Transcription Factor Staining Buffer Set	00-5523-00	Intranuclear staining and fixation	−	According to the manufacturer’s instructions.
eBioscience	IC Fixation Buffer	00-8222-49	Fixation	−	According to the manufacturer’s instructions.
eBioscience	Brefeldin A Solution (1000X)	00-4506-51	Cytokine intracellular staining	1/1000	The cells were stimulated for 3−4 h in RPMI-1640 with 2% FBS before staining.
Sigma-Aldrich	PMA (Phorbol 12-myristate 13-acetate)	P8139	Cytokine intracellular staining	50 ng/ml	The cells were stimulated for 3−4 h in RPMI-1640 with 2% FBS before staining.
Sigma-Aldrich	Ionomycin	I0634	Cytokine intracellular staining	500 ng/ml	The cells were stimulated for 3−4 h in RPMI-1640 with 2% FBS before staining.
Roche Diagnostics	Collagenase Ⅱ		Digestion of kidneys	5 mg/ml	In RPMI-1640 with 2% FBS for 30 min at 37 °C
Roche Diagnostics	DNase I	10104159001	Digestion of kidneys	100 mg/ml	In RPMI-1640 with 2% FBS for 30 min at 37 °C

## Sheet: autoMACS separation
autoMACS separation
Reactivity	Company	Product No	Name	Target	Clone	Dilution
Mouse	Miltenyi Biotec	130-052-301	CD45 MicroBeads	CD45	30F11.1	According to the manufacturer’s instructions.
−	Miltenyi Biotec		Anti-APC MicroBeads	Phycoerythrin	−	According to the manufacturer’s instructions.
